# Supplementary material for: Combination of Expanded Allogeneic NK Cells and T Cell-Based Immunotherapy Exert Enhanced Antitumor Effects
Source: MDPI journal article supplement (doi:10.3390/cancers15010251), 2022-12-30
Supplement: s1 [file s1]

Supplementary Table S1. The HLA allele information.

|        | Donor.No | HLA-A       | HLA-B       | HLA-C       | HLA-DR      | HLA-DQ      |
|--------|----------|-------------|-------------|-------------|-------------|-------------|
| PBMC/T | P1       | 02:01,11:01 | 40:01,67:01 | 07:02,07:02 | 12:02,16:02 | 05:02,03:01 |
|        | P2       | 01:01,30:01 | 13:02,35:01 | 04:01,06:02 | 01:01,07:01 | 05:01,02:02 |
|        | P3       | 30:01,32:01 | 13:02,44:02 | 05:01,06:02 | 07:01,12:01 | 02:02,03:01 |
|        | P4       | 02:01,11:01 | 40:01,54:01 | 01:02,03:04 | 04:03,08:03 | 06:01,03:02 |
|        | P5       | 02:10,31:01 | 15:58,40:06 | 01:02,08:01 | 12:01,14:54 | 05:02,03:01 |
|        | P6       | 11:01,31:01 | 51:01,51:02 | 14:02,15:02 | 12:10,15:01 | 03:01,06:01 |
| NK     | N1       | 02:01,24:02 | 15:27,35:01 | 03:03,04:01 | 08:03,15:01 | 06:01,06:02 |
|        | N2       | 11:01,11:01 | 15:01,40:01 | 04:01,07:02 | 04:03,04:06 | 03:02,03:02 |
|        | N3       | 11:01,26:01 | 40:01,40:01 | 07:02,07:66 | 14:54,14:54 | 05:02,05:02 |
|        | N4       | 24:02,24:02 | 46:01,51:02 | 01:02,15:02 | 08:02,09:01 | 03:03,04:02 |
|        | N5       | 01:01,30:01 | 13:02,37:01 | 06:02,06:02 | 07:01,10:01 | 05:01,02:02 |
